# Supplementary material for: Crystallisation triggered by mass diffusion at a lower local supersaturation
Source: Research Square preprint supplement (doi:10.21203/rs.3.rs-7305721/v1), 2025-08-21
Supplement: Supplementary file 1 [file bb9f7b7eb5bfd16663eb79b6.pdf]

## *Supplementary Information*

# **Crystallisation triggered by mass diffusion at a lower local supersaturation**

Shuqi Xu<sup>1</sup> and Juan F. Torres<sup>1</sup>

<sup>1</sup>ANU HEAT Lab, School of Engineering, Australian National University, Canberra, Australia

## **Supplementary Figures**

|                                                                              |   |
|------------------------------------------------------------------------------|---|
| <b>Fig. 1</b> Temperature control . . . . .                                  | 2 |
| <b>Fig. 2</b> Cooling crystallisation at 1980 s . . . . .                    | 2 |
| <b>Fig. 3</b> Contrast factor measurement . . . . .                          | 3 |
| <b>Fig. 4</b> KCl thermodiffusion without crystallisation . . . . .          | 3 |
| <b>Fig. 5</b> Evaporation suppression for the crystallisation cell . . . . . | 4 |
| <b>Fig. 6</b> Phase-shifting interferometry (PSI) . . . . .                  | 4 |

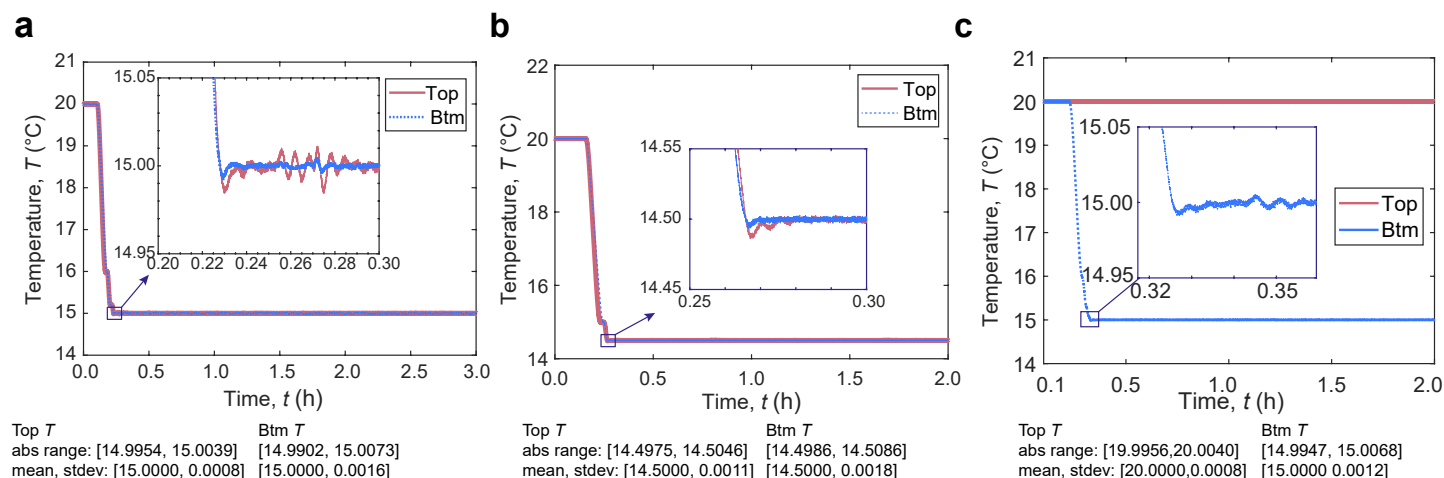

**Supplementary Fig. 1 | Temperature control.** **a**, Top and bottom boundaries cool from 20 °C to 15 °C. **b**, Top and bottom boundaries cool from 20 °C to 14.5 °C. **c**, Top boundary remains at 20 °C and bottom boundary cools from 20 °C to 15.0 °C.

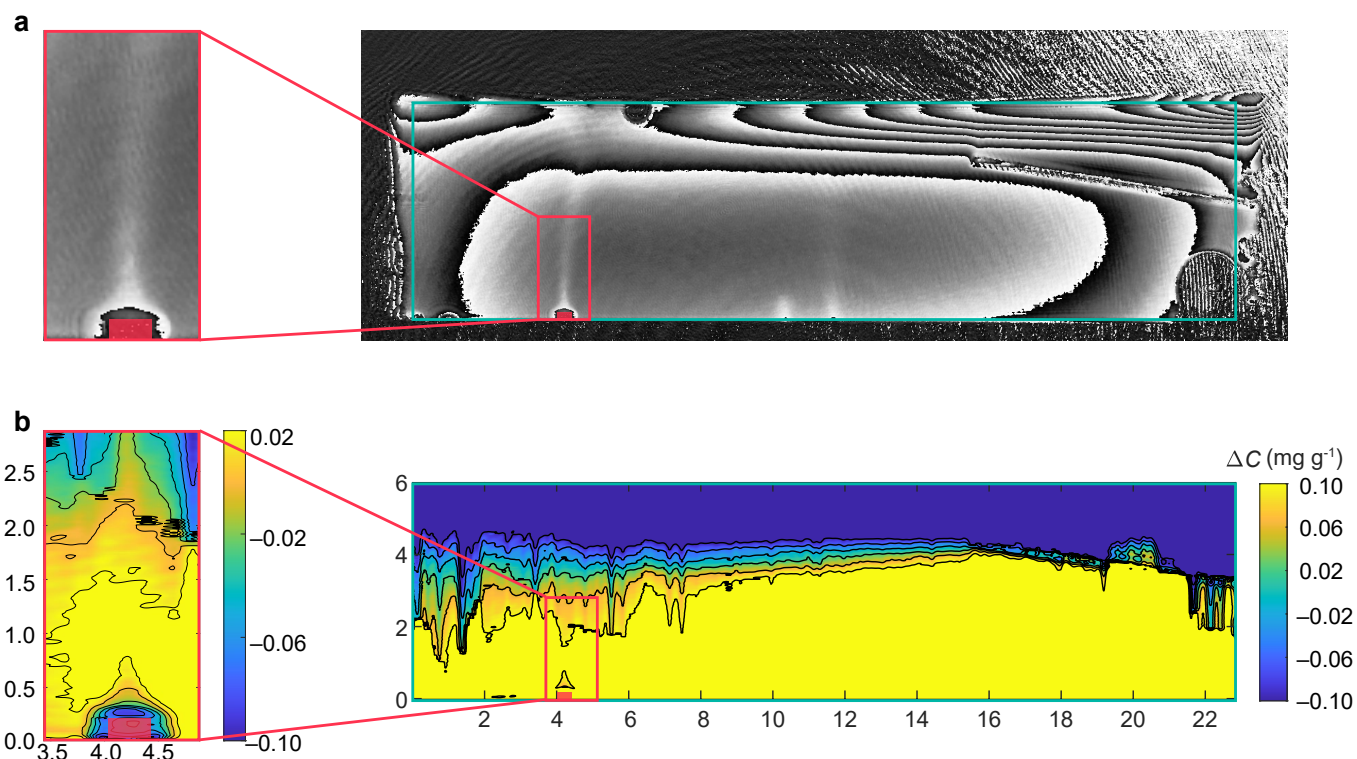

**Supplementary Fig. 2 | Cooling crystallisation at 1980 s.** **a**, Phase-shifted data, with one growing crystal magnified on the left. **b**, Concentration profile, with the same growing crystal magnified. Solute depletion is evident near the growing crystal, generating a rising plume that reduces the solute concentration in the upper half of the cell during active crystal growth.

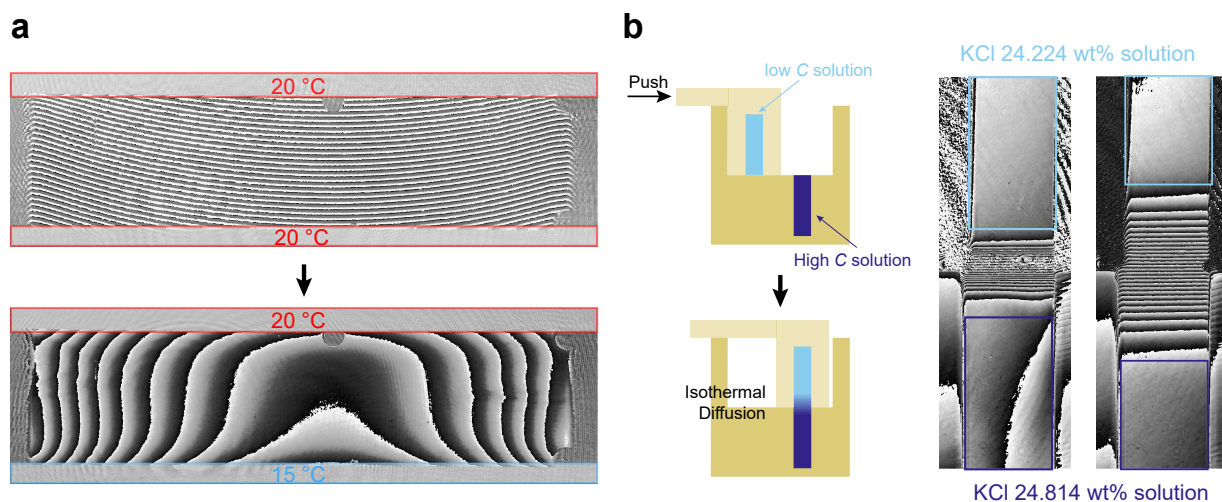

**Supplementary Fig. 3 | Contrast factor measurement.** **a**, Contrast factor  $\delta\Psi/\delta T_{C=C_0}$  is measured by applying a known temperature difference to solution  $C = C_0$ . The boundary temperatures are measured with thermistors and  $\delta\Psi/\delta T_{C=C_0}$  is assumed to be a constant when  $\Delta T$  is small. Thus  $\delta\Psi/\delta T_{C=C_0} = \frac{\Delta\Psi}{OP\Delta T}$  where OP is the optical path length. **b**, Contrast factor  $\delta\Psi/\delta C_{T=\text{constant}}$  is measured by performing an isothermal diffusion experiment. The isothermal diffusion experiment was done through sliding the top part containing low  $C$  solution onto the bottom part containing the high  $C$  solution. Diffusion occurs from the high and low  $C$  solution interface.  $C_{\text{high}} = 24.814 \text{ wt\%}$  and  $C_{\text{low}} = 24.224 \text{ wt\%}$ . We assume that the contrast factor at  $C_0 = 25.36 \text{ wt\%}$  is the same. From the top to bottom, the concentration increases while the phase  $\Psi$  decreases, i.e., each fringe changes from bright to dark. Thus the contrast factor  $\delta\Psi/\delta C$  is negative and  $\delta\Psi/\delta C_{T=T_0} = \frac{\Delta\Psi}{OP\Delta C}$ .

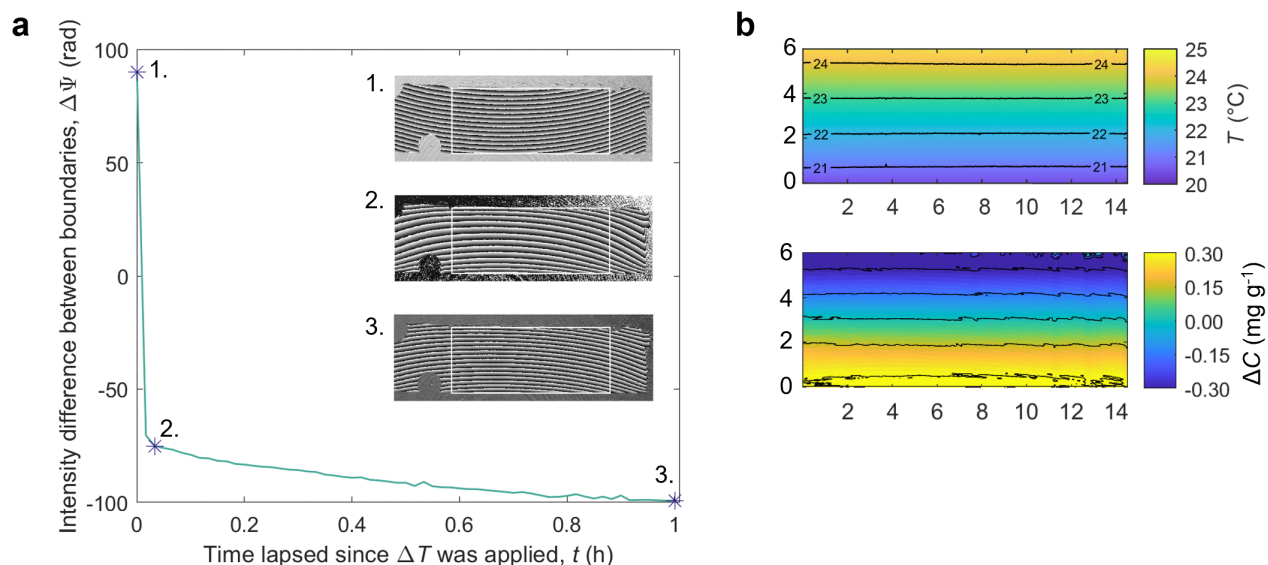

**Supplementary Fig. 4 | KCl thermodiffusion without crystallisation.** **a**, The unwrapped phase change  $\Psi$  as time progresses. The thermodiffusion is nearly constant after 0.8 h. Between 1 and 2 is the temperature development phase and between 2 and 3 is the concentration development phase. **b**, The temperature map is obtained by subtracting unwrapped PSI image in **a1** from **a2** and the concentration difference map is obtained by subtracting unwrapped PSI image in **a2** from **a3**. The maximum  $\Delta C$  is  $0.3097 \text{ mg g}^{-1}$  and the minimum  $\Delta C$  is  $-0.3422 \text{ mg g}^{-1}$ .

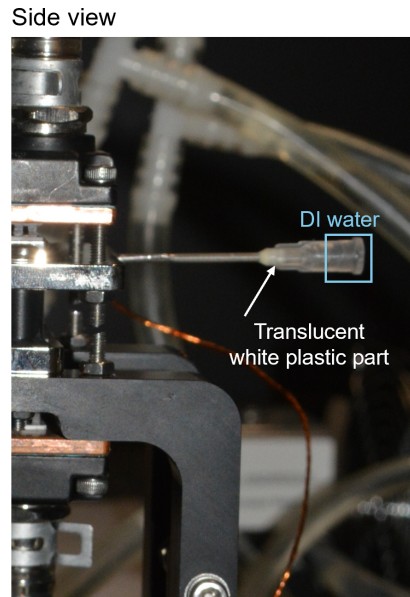

**Supplementary Fig. 5 | Evaporation suppression for the crystallisation cell.** Photo showing the side view with a glued needle used to suppress evaporation from the solution injection hole. The KCl solution was removed from the white plastic part by a lint-free tissue, and then the DI water was injected slightly forming a seal. The white part is translucent to confirm that there is air between the KCl solution in the needle and the injected DI water. This produced a tight seal of the crystallisation cell.

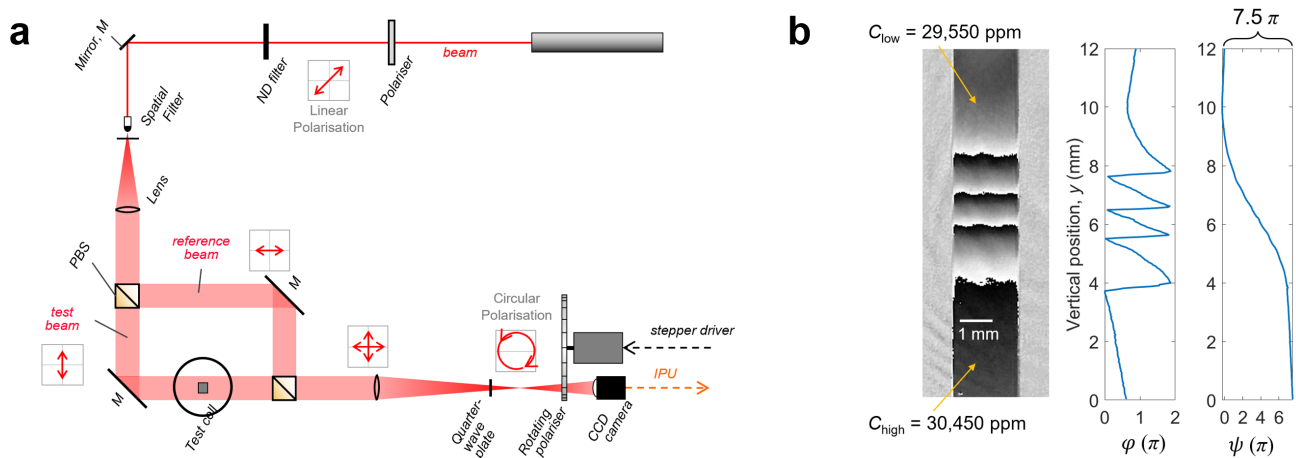

**Supplementary Fig. 6 | Phase-shifting interferometry (PSI).** **a**, Layout of the polarising Mach-Zehnder interferometer with rotating polariser, which is the basis for the PSI technique with a temporal phase-shifting algorithm, as described in Torres et al. *Optics and Laser in Engineering* **50**, 1287–1296 (2012). Adapted with permission of Elsevier. **b**, On the left is a typical phase-shifted data, which describes the diffusion field between a low and high concentration solution,  $C_{\text{high}}$  and  $C_{\text{low}}$ , respectively. The phase  $\varphi$  and the unwrapped phase  $\psi$  are plotted against the cell height on the right. The unwrapped phase map  $\psi$  connects discrete values of  $\varphi$ .
